# Supplementary material for: Stringent thresholds in SARS-CoV-2 IgG assays lead to under-detection of mild infections
Source: Springer Nature journal article supplement (doi:10.1186/s12879-021-05878-2), 2021-02-18
Supplement: MOESM1 [file 18879348]

# Stringent thresholds in SARS-CoV-2 IgG assays lead to under-detection of mild infections: Supplement

\*David W Eyre<sup>1,2,3,4</sup>, Sheila F Lumley<sup>2,5</sup>, Denise O'Donnell<sup>5</sup>, Nicole E Stoesser<sup>2,3,4,5</sup>, Philippa C Matthews<sup>2,3,5</sup>, Alison Howarth<sup>5</sup>, Stephanie B Hatch<sup>5</sup>, Brian D Marsden<sup>5,6</sup>, Stuart Cox<sup>2</sup>, Tim James<sup>2</sup>, Richard J Cornall<sup>5</sup>, David I Stuart<sup>5</sup>, Gavin Screaton<sup>5</sup>, Daniel Ebner<sup>5,7</sup>, Derrick W Crook<sup>2,3,5</sup>, Christopher P Conlon<sup>2,5</sup>, Katie Jeffery<sup>2</sup>, Timothy M Walker<sup>2,5,8</sup>, Timothy EA Peto<sup>2,3,5</sup>

<sup>1</sup>Big Data Institute, Nuffield Department of Population Health, University of Oxford, Oxford, UK

<sup>2</sup>Oxford University Hospitals NHS Foundation Trust, Oxford, UK

<sup>3</sup>NIHR Oxford Biomedical Research Centre, University of Oxford, Oxford, UK

<sup>4</sup>NIHR Health Protection Research Unit in Healthcare Associated Infections and Antimicrobial Resistance at University of Oxford in partnership with Public Health England, Oxford, UK

<sup>5</sup>Nuffield Department of Medicine, University of Oxford, Oxford, UK

<sup>6</sup>Kennedy Institute of Rheumatology Research, University of Oxford, UK

<sup>7</sup>Target Discovery Institute, University of Oxford, Oxford, UK

<sup>8</sup>Oxford University Clinical Research Unit, Ho Chi Minh City, Vietnam

\*Corresponding author:

David Eyre, [david.eyre@bdi.ox.ac.uk](mailto:david.eyre@bdi.ox.ac.uk),

+44 (0)1865 221081,

Microbiology Department, John Radcliffe Hospital, Headley Way, Oxford, OX3 9DU

Supplementary figures and table

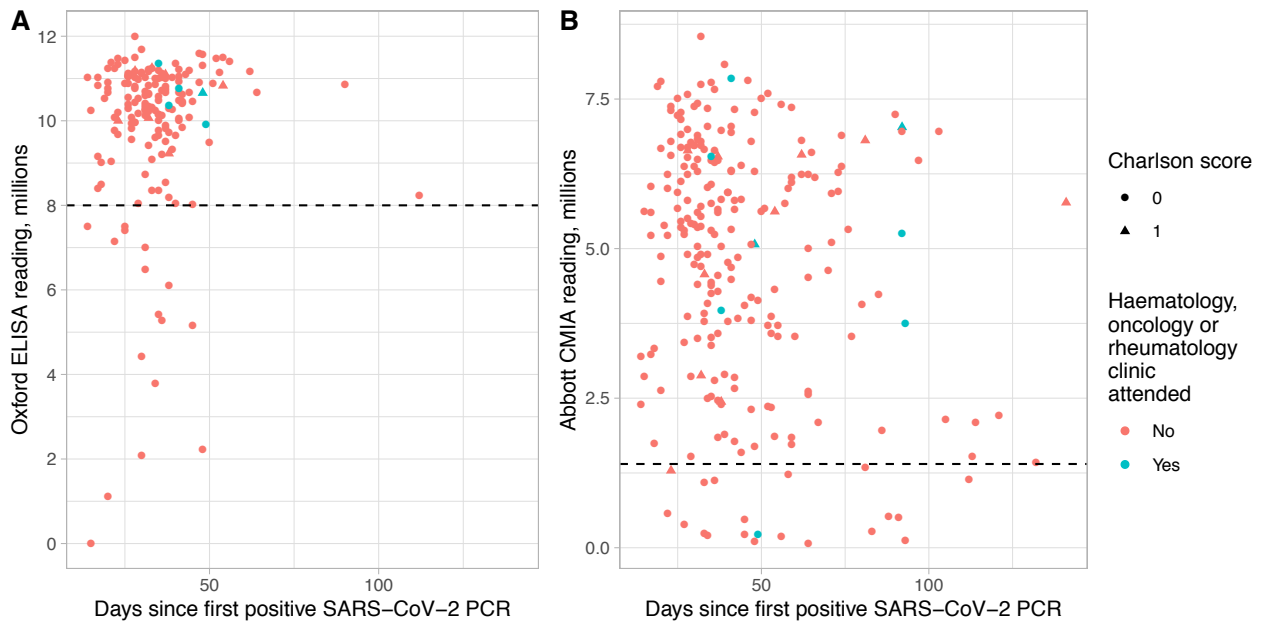

**Supplementary Figure S1. SARS-CoV-2 IgG antibody readings in 245 convalescent symptomatic healthcare workers  $\geq 14$  days following a positive PCR test.** Panel A shows readings using the Oxford ELISA assay targeting trimeric spike protein (n=171) and panel B shows readings using the Abbott CMIA targeting nucleocapsid protein (n=240). The dashed horizontal lines show the threshold for reporting antibodies as detected. Points are coloured by whether staff had attended a haematology, oncology or rheumatology clinic since 01 January 2019 (as a proxy for immunosuppression), and the plotted shapes indicate Charlson comorbidity scores based on diagnostic codes from any admissions to hospital since 01 January 2019.

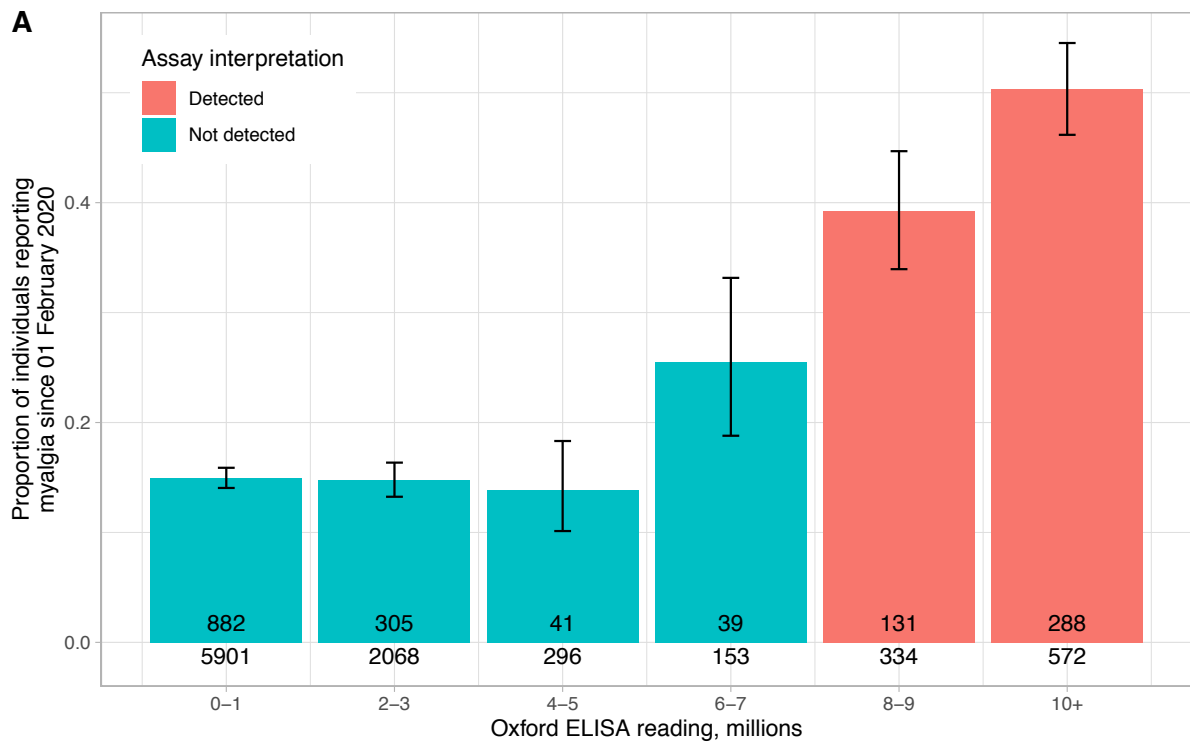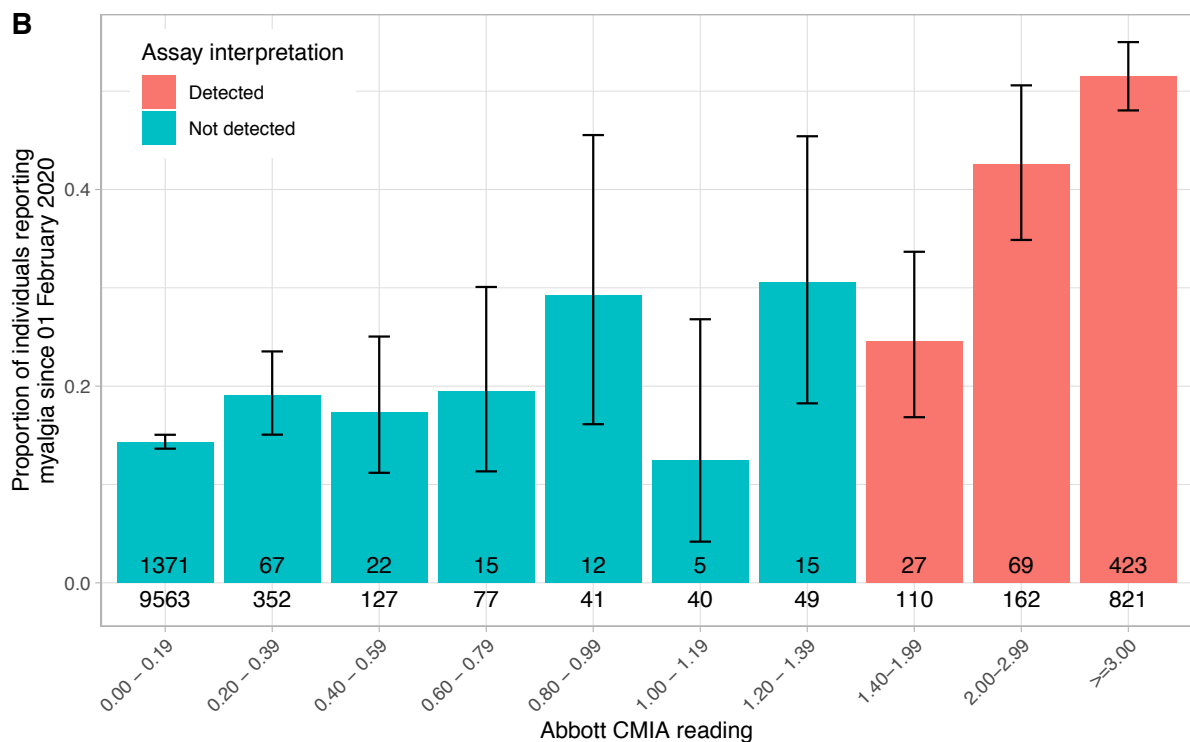

**Supplementary Figure S2. Association of previous myalgia with immunoassay reading.**

Panel A shows the results using a trimeric spike ELISA and panel B the results from the Abbott CMIA targeting nucleocapsid protein, with blue showing results called negative and red showing those called as positive based on pre-defined assay thresholds. The number of individuals with myalgia is shown in each bar, and the total number of individuals with each antibody reading below the bar. The error bars show 95% confidence intervals. For the Oxford ELISA readings each value is rounded down, such that for example a value of 1.7 million is within the 1 million bar.

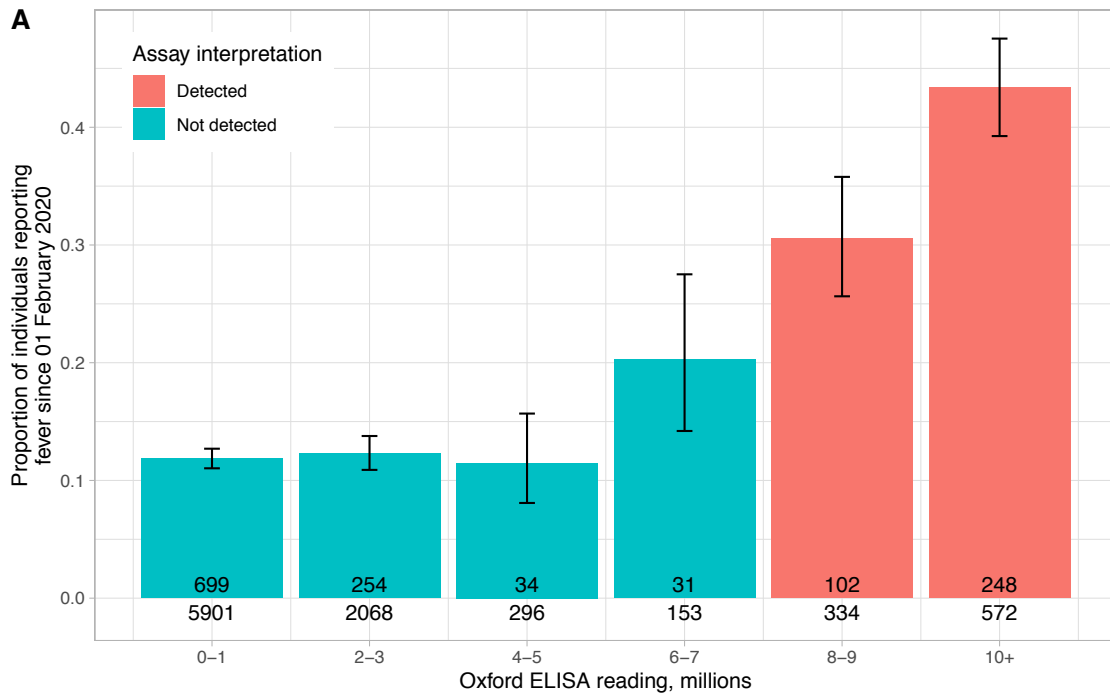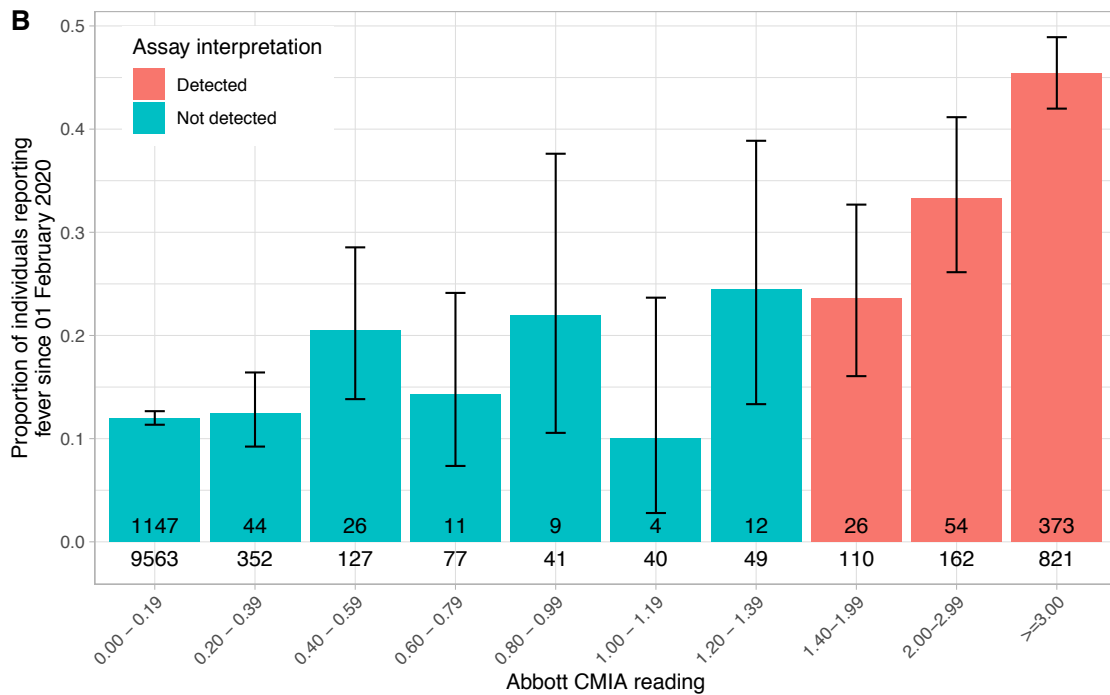

**Supplementary Figure S3. Association of previous fever with immunoassay reading.**

Panel A shows the results using a trimeric spike ELISA and panel B the results from the Abbott CMIA targeting nucleocapsid protein, with blue showing results called negative and red showing those called as positive based on pre-defined assay thresholds. The number of individuals with previous fever is shown in each bar, and the total number of individuals with each antibody reading below the bar. The error bars show 95% confidence intervals. For the Oxford ELISA readings each value is rounded down, such that for example a value of 1.7 million is within the 1 million bar.

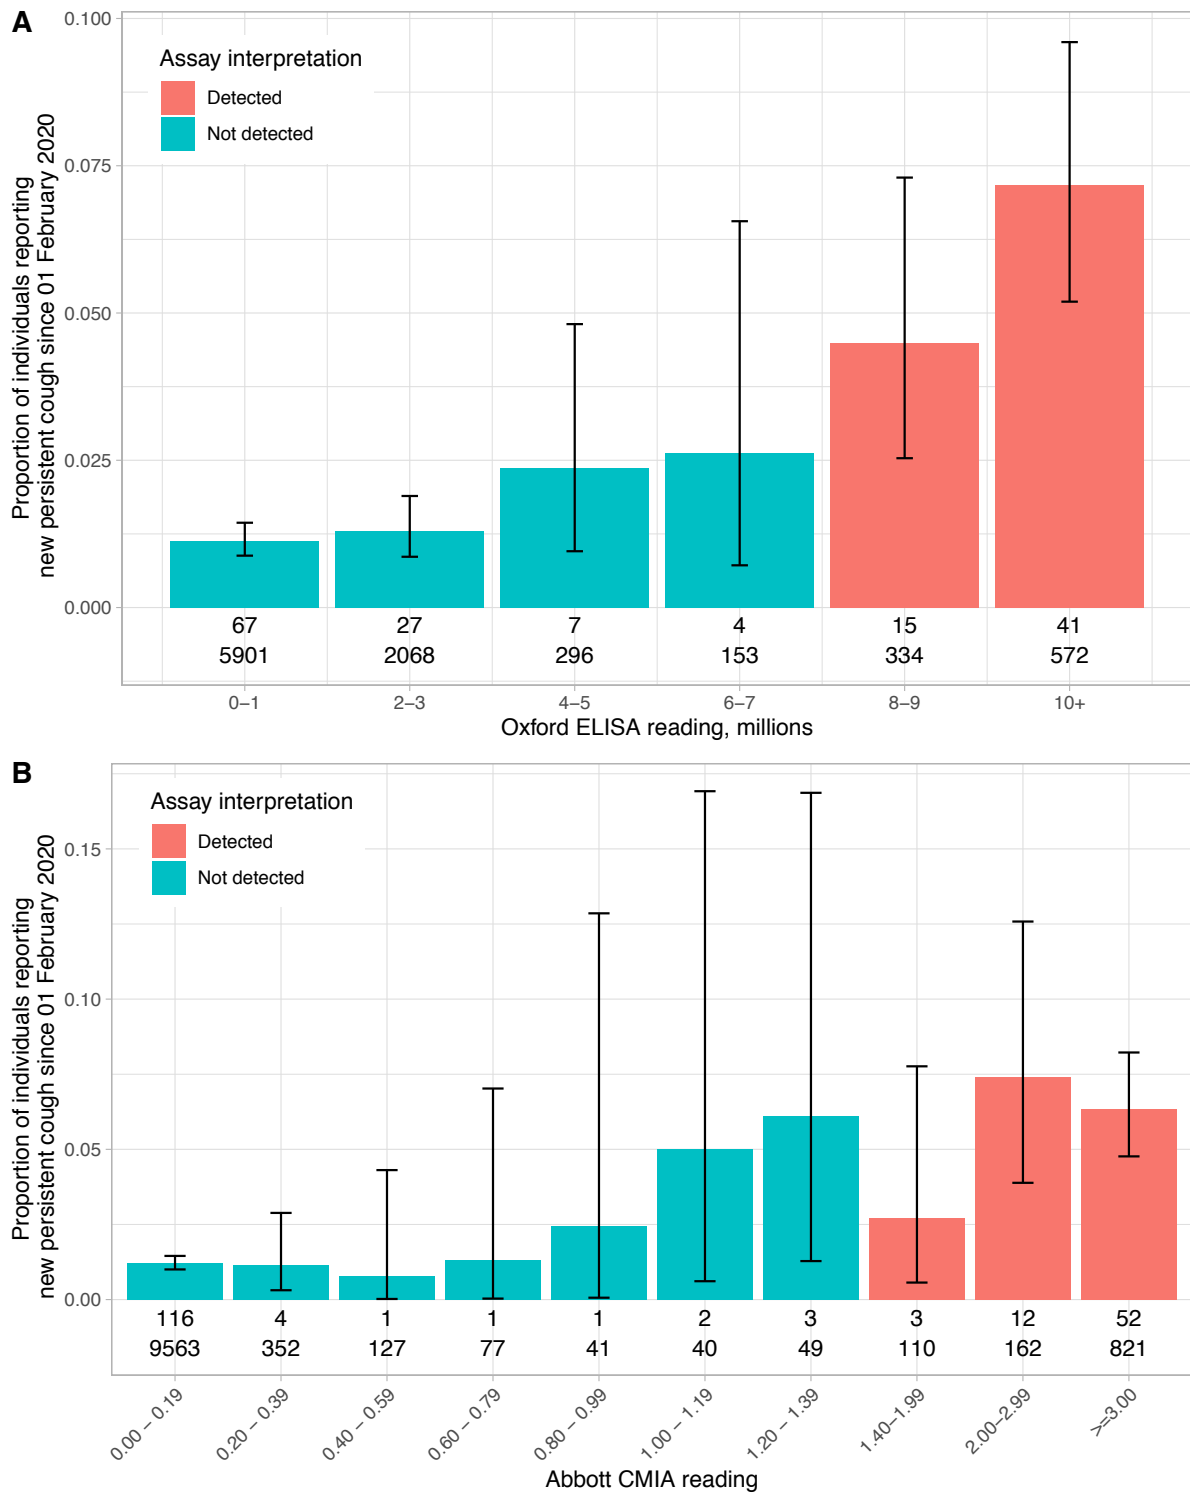

**Supplementary Figure S4. Association of previous new persistent cough with immunoassay reading.**

Panel A shows the results using a trimeric spike ELISA and panel B the results from the Abbott CMIA targeting nucleocapsid protein, with blue showing results called negative and red showing those called as positive based on pre-defined assay thresholds. The number of individuals with previous new persistent cough is shown in each bar, and the total number of individuals with each antibody reading below the bar. The error bars show 95% confidence intervals. For the Oxford ELISA readings each value is rounded down, such that for example a value of 1.7 million is within the 1 million bar.

|                 |                                                                           | Total | Number reporting anosmia | Percentage with Covid-19 reporting anosmia/ ageusia | Univariable odds ratio for anosmia/ ageusia | 95% CI       | p value | Multivariable odds ratio for anosmia | 95% CI       | p value |
|-----------------|---------------------------------------------------------------------------|-------|--------------------------|-----------------------------------------------------|---------------------------------------------|--------------|---------|--------------------------------------|--------------|---------|
| Ethnicity       | White                                                                     | 720   | 333                      | 46%                                                 | 1.00                                        |              |         |                                      |              |         |
|                 | Asian                                                                     | 300   | 141                      | 47%                                                 | 1.03                                        | (0.79, 1.35) | 0.83    |                                      |              |         |
|                 | Black                                                                     | 81    | 32                       | 40%                                                 | 0.76                                        | (0.47, 1.21) | 0.25    |                                      |              |         |
|                 | Chinese                                                                   | 10    | 5                        | 50%                                                 | 1.16                                        | (0.33, 4.05) | 0.81    |                                      |              |         |
|                 | Mixed                                                                     | 36    | 15                       | 42%                                                 | 0.83                                        | (0.42, 1.64) | 0.59    |                                      |              |         |
|                 | Not stated                                                                | 17    | 7                        | 41%                                                 | 0.81                                        | (0.31, 2.16) | 0.68    |                                      |              |         |
|                 | Other                                                                     | 47    | 21                       | 45%                                                 | 0.94                                        | (0.52, 1.70) | 0.83    |                                      |              |         |
| Role            | Administrative staff                                                      | 94    | 39                       | 41%                                                 | 1.00                                        |              |         | 1.00                                 |              |         |
|                 | Biomedical scientist and laboratory staff                                 | 35    | 23                       | 66%                                                 | 2.70                                        | (1.20, 6.07) | 0.02    | 2.81                                 | (1.24, 6.34) | 0.01    |
|                 | Senior doctor                                                             | 63    | 24                       | 38%                                                 | 0.87                                        | (0.45, 1.67) | 0.67    | 1.01                                 | (0.51, 1.97) | 0.99    |
|                 | Junior doctor                                                             | 128   | 68                       | 53%                                                 | 1.60                                        | (0.93, 2.74) | 0.09    | 1.77                                 | (1.02, 3.08) | 0.04    |
|                 | Nurse, healthcare assistant                                               | 599   | 285                      | 48%                                                 | 1.28                                        | (0.82, 1.99) | 0.27    | 1.27                                 | (0.82, 1.98) | 0.29    |
|                 | Other                                                                     | 112   | 46                       | 41%                                                 | 0.98                                        | (0.56, 1.72) | 0.95    | 1.05                                 | (0.60, 1.84) | 0.87    |
|                 | Other allied health professional                                          | 47    | 24                       | 51%                                                 | 1.47                                        | (0.73, 2.97) | 0.28    | 1.49                                 | (0.73, 3.01) | 0.27    |
|                 | Porter, Domestic                                                          | 62    | 15                       | 24%                                                 | 0.45                                        | (0.22, 0.92) | 0.03    | 0.54                                 | (0.26, 1.13) | 0.10    |
|                 | Physiotherapists, Occupational therapists, Speech and language therapists | 45    | 19                       | 42%                                                 | 1.03                                        | (0.50, 2.12) | 0.94    | 1.01                                 | (0.49, 2.09) | 0.97    |
|                 | Security, Estates, Catering                                               | 26    | 11                       | 42%                                                 | 1.03                                        | (0.43, 2.49) | 0.94    | 1.22                                 | (0.50, 3.00) | 0.66    |
| Speciality area | Other                                                                     | 406   | 172                      | 42%                                                 | 1.00                                        |              |         |                                      |              |         |
|                 | Anaesthetics                                                              | 21    | 8                        | 38%                                                 | 0.84                                        | (0.34, 2.06) | 0.70    |                                      |              |         |
|                 | Emergency Medicine                                                        | 44    | 22                       | 50%                                                 | 1.36                                        | (0.73, 2.54) | 0.33    |                                      |              |         |
|                 | General Surgery, Urology, Plastics, Vascular, Cardiothoracic surgery      | 83    | 41                       | 49%                                                 | 1.33                                        | (0.83, 2.13) | 0.24    |                                      |              |         |
|                 | Haematology, Oncology                                                     | 53    | 22                       | 42%                                                 | 0.97                                        | (0.54, 1.73) | 0.91    |                                      |              |         |
|                 | Infectious Diseases, Respiratory                                          | 30    | 11                       | 37%                                                 | 0.79                                        | (0.37, 1.70) | 0.54    |                                      |              |         |
|                 | Intensive Care Medicine                                                   | 48    | 23                       | 48%                                                 | 1.25                                        | (0.69, 2.28) | 0.46    |                                      |              |         |

|        |                                                            |     |     |     |      |               |       |      |               |      |
|--------|------------------------------------------------------------|-----|-----|-----|------|---------------|-------|------|---------------|------|
|        | Medicine                                                   | 228 | 117 | 51% | 1.43 | (1.04, 1.99)  | 0.03  |      |               |      |
|        | Obstetrics and Gynaecology                                 | 18  | 8   | 44% | 1.09 | (0.42, 2.82)  | 0.86  |      |               |      |
|        | Ophthalmology, Ear, Nose and Throat, Maxillofacial surgery | 10  | 8   | 80% | 5.44 | (1.14, 25.95) | 0.03  |      |               |      |
|        | Paediatrics                                                | 45  | 28  | 62% | 2.24 | (1.19, 4.22)  | 0.01  |      |               |      |
|        | Radiology                                                  | 35  | 18  | 51% | 1.44 | (0.72, 2.88)  | 0.30  |      |               |      |
|        | Specialist Medicine                                        | 130 | 53  | 41% | 0.94 | (0.63, 1.40)  | 0.75  |      |               |      |
|        | Trauma and Orthopaedics, Rheumatology                      | 60  | 23  | 38% | 0.85 | (0.48, 1.48)  | 0.56  |      |               |      |
| Gender | Female                                                     | 861 | 418 | 49% | 1.00 |               |       | 1.00 |               |      |
|        | Male                                                       | 347 | 135 | 39% | 0.65 | (0.52, 0.87)  | 0.002 | 0.72 | (0.50, 0.89)  | 0.02 |
|        | Prefer not to say                                          | 2   | 1   | 50% | 1.00 | (0.07, 17.00) | 0.97  | 1.15 | (0.07, 18.88) | 0.92 |
|        | Trans                                                      | 1   | 0   | 0%  | 0.00 | (0.00, >100)  | 0.97  | 0.00 | (0.00, >100)  | 0.97 |
| Age    | per 10 year increase                                       |     |     |     | 0.91 | (0.82, 1.00)  | 0.05  |      |               |      |

**Supplementary Table S1. Association between demographic and workplace factors and self-reported anosmia or ageusia in 1211 healthcare workers with positive SARS-CoV-2 serology.**

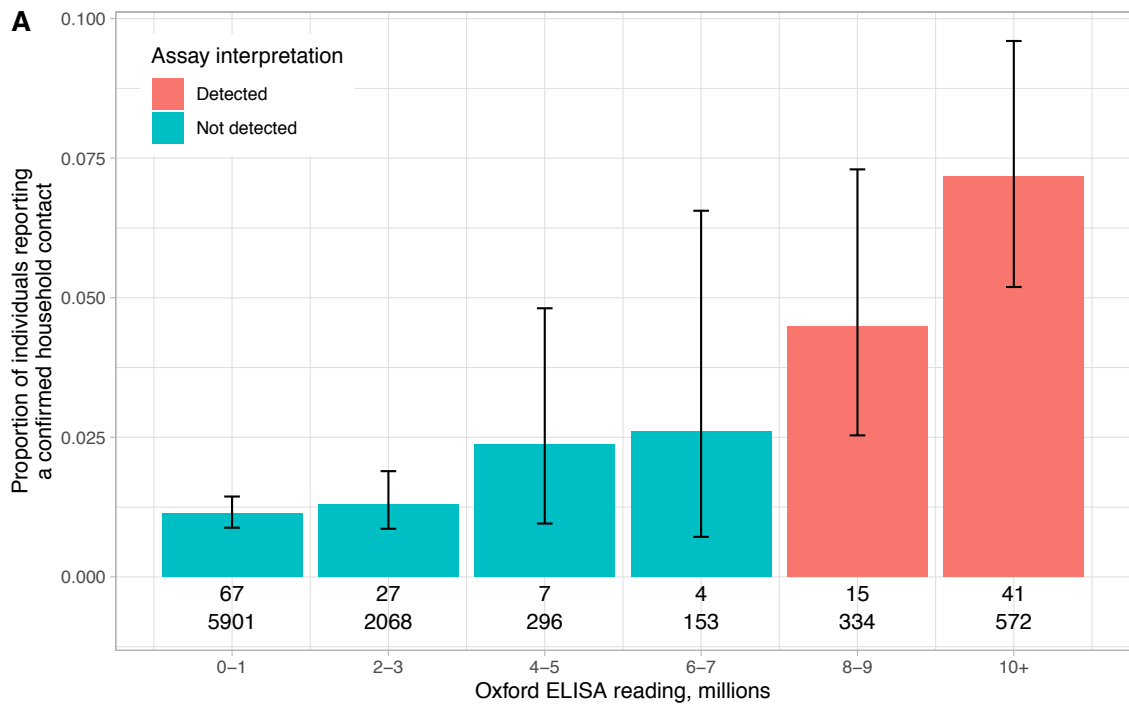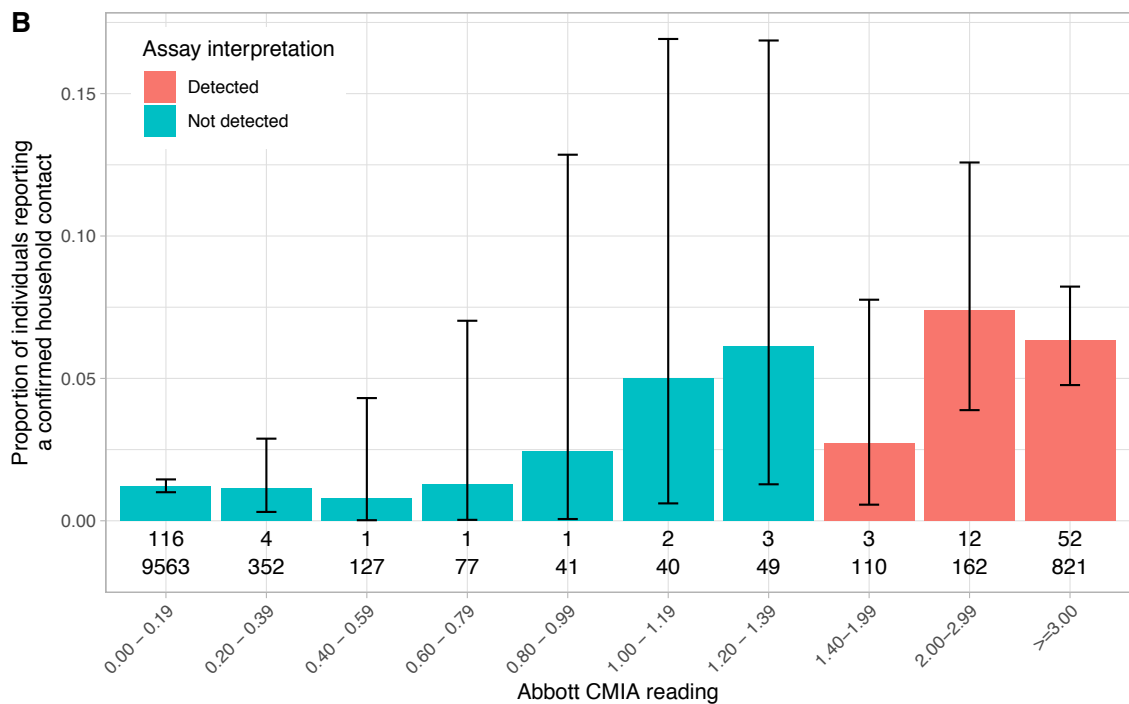

**Supplementary Figure S5. Association of a PCR-confirmed household contact with immunoassay reading.** Panel A shows the results using a trimeric spike ELISA and panel B the results from the Abbott CMIA targeting nucleocapsid protein, with blue showing results called negative and red showing those called as positive based on pre-defined assay thresholds. The number of individuals with a household contact is shown just below each bar, and the total number of individuals with each antibody reading is shown below that. The error bars show 95% confidence intervals. For the Oxford ELISA readings each value is rounded down, such that for example a value of 1.7 million is within the 1 million bar.
